# Supplementary material for: Glutathione-directed synthesis of Cr(vi)- and temperature-responsive fluorescent copper nanoclusters and their applications in cellular imaging
Source: Royal Society of Chemistry journal article supplement (doi:10.1039/c5nj03245h), 2016-01-01
Supplement: c5nj03245h1.pdf [file c5nj03245h1.pdf]

## Electronic Supplementary Material

### **Glutathione-directed synthesis of Cr(VI)- and temperature-responsive fluorescent copper nanoclusters and their applications in cellular imaging**

Lingcan Kong,<sup>a\*</sup> Xuefeng Chu,<sup>b</sup> Wenwei Liu,<sup>a</sup> Yuyang Yao,<sup>a</sup> Pengfei Zhu<sup>a</sup> and Xia Ling<sup>a\*</sup>

<sup>a</sup>*Wuxi Center for Disease Control and Prevention, Wuxi 214023, P.R. China*

<sup>b</sup>*Department of Basic Science, Jilin Jianzhu University, Changchun 130118, P. R. China*

*Email: [konglingcan2010@163.com](mailto:konglingcan2010@163.com)*

*[wxcdclingxia@sina.com](mailto:wxcdclingxia@sina.com)*

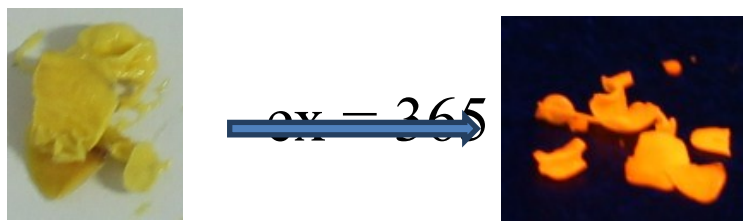

**Figure S1** The solid of as-prepared Cu NCs at the room temperature (left) and under a 365 nm UV light source (right).

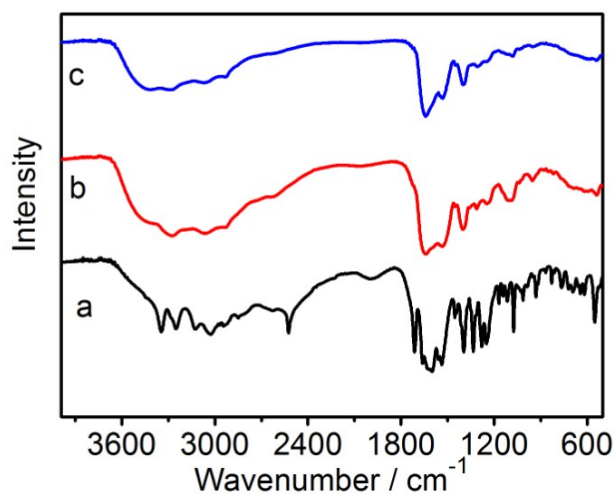

**Figure S2** The FT-IR spectra of pure glutathione (a) and as-prepared Cu NCs (b) which confirm that the surface of as-prepared Cu NCs was protected by glutathione. (c) The FT-IR spectra of freeze-dried Cu NCs solid prepared by Cu NCs aqueous solution stirring for five minutes upon addition  $\text{K}_2\text{Cr}_2\text{O}_7$  to  $36 \mu\text{mol}\cdot\text{L}^{-1}$  and then freeze-dried.

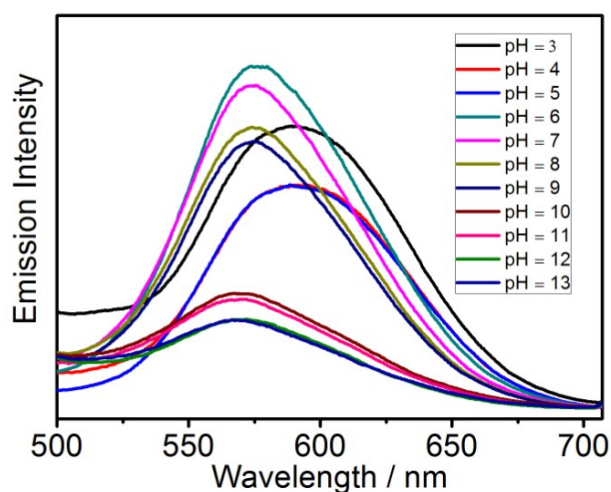

**Figure S3** Fluorescence spectra of Cu NCs responses to pH ranging from 3 to 13.

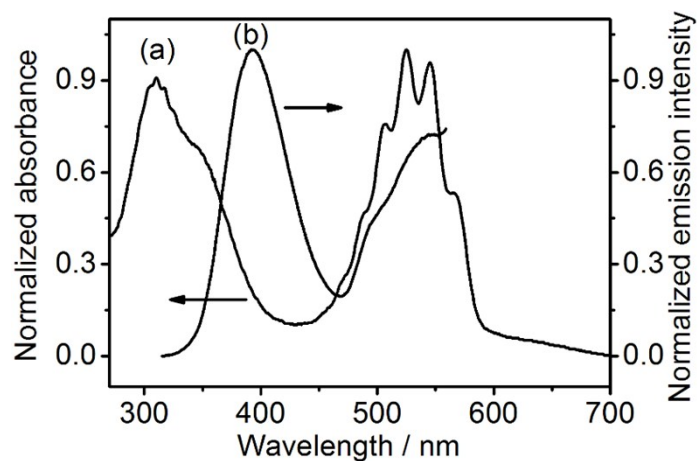

**Figure S4** a) The normalized absorbance spectrum of potassium permanganate aqueous solution. b) The normalized excitation spectrum of Cu NCs aqueous solution.

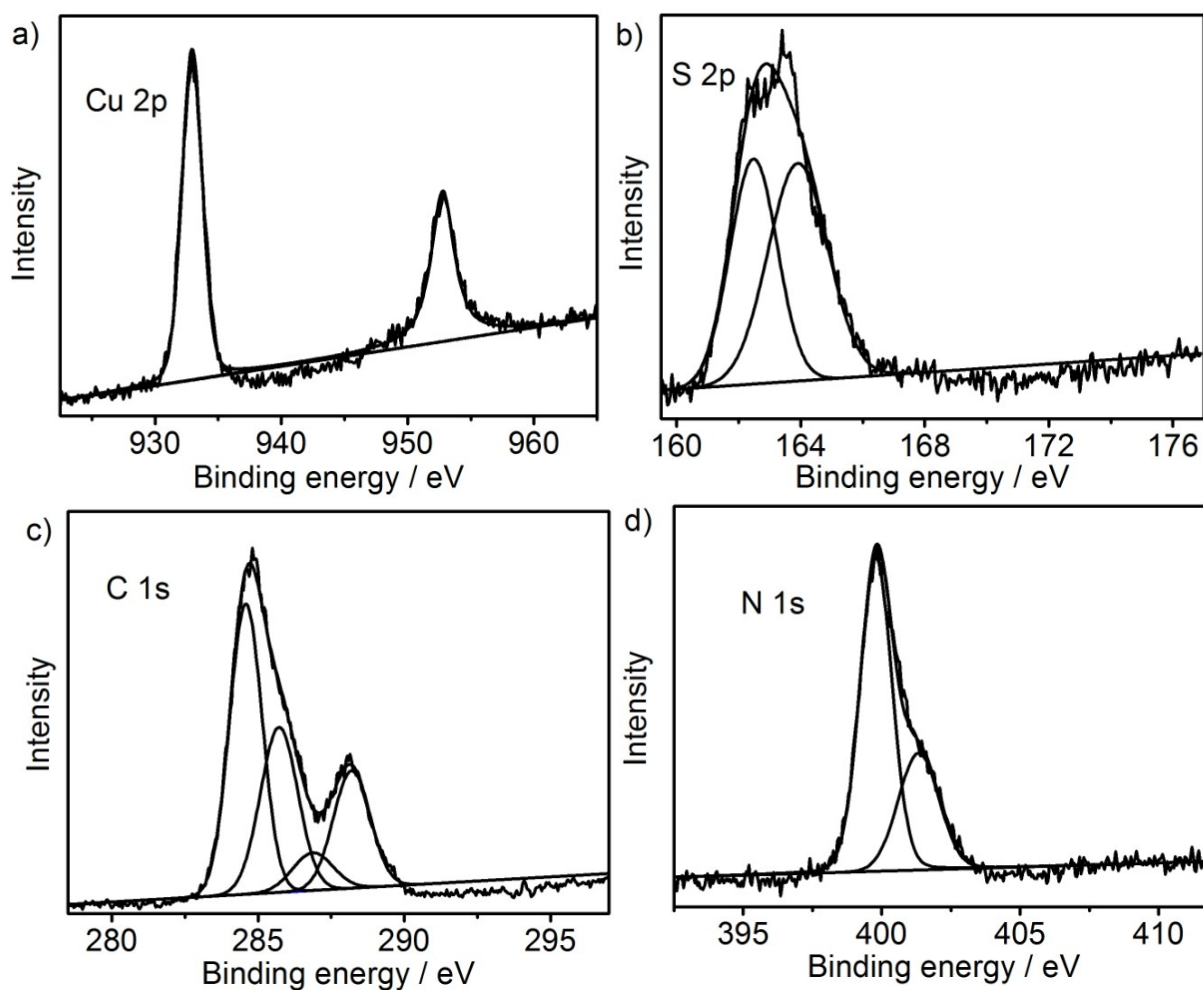

**Figure S5** XPS spectra of as-prepared Cu NCs prepared by Cu NCs aqueous solution stirring for five minutes upon addition  $K_2Cr_2O_7$  to  $36 \mu\text{mol}\cdot\text{L}^{-1}$  and then freeze-dried: a) Cu 2p; b) S 2p; c) C 1s; d) N 1s.

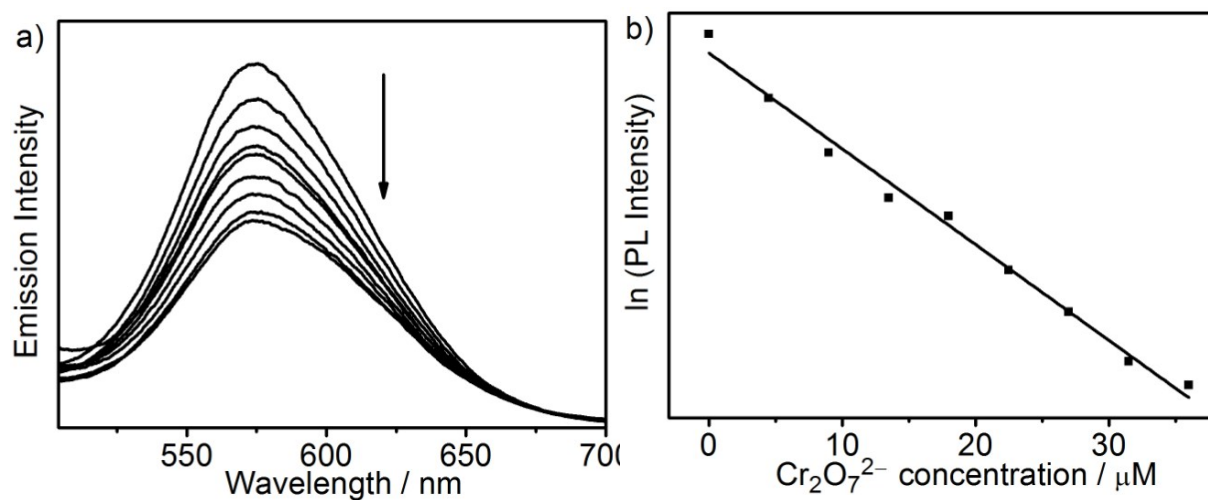

**Figure S6** a) Emission spectral changes of Cu NCs in tap water upon addition of different amounts of  $\text{Cr}_2\text{O}_7^{2-}$  ions (0, 4.5, 9, 13.5, 18, 22.5, 27, 31.5, 36  $\mu\text{mol}\cdot\text{L}^{-1}$ ). b) Linear relationship between the logarithm of emission intensity and the concentration of  $\text{Cr}_2\text{O}_7^{2-}$  ions.

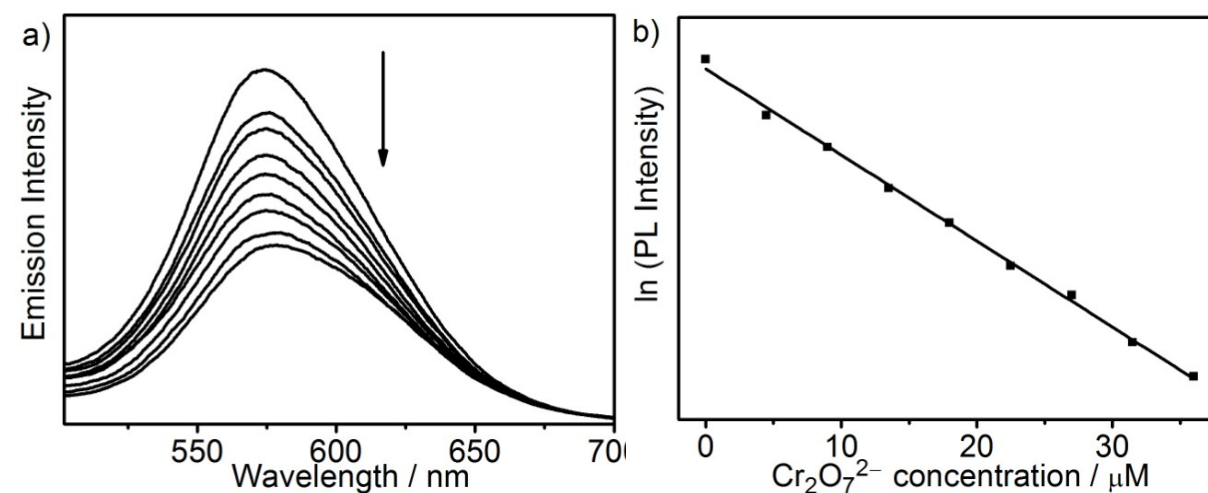

**Figure S7** a) Emission spectral changes of Cu NCs in mineral water upon addition of different amounts of  $\text{Cr}_2\text{O}_7^{2-}$  ions (0, 4.5, 9, 13.5, 18, 22.5, 27, 31.5, 36  $\mu\text{mol}\cdot\text{L}^{-1}$ ). b) Linear relationship between the logarithm of emission intensity and the concentration of  $\text{Cr}_2\text{O}_7^{2-}$  ions.

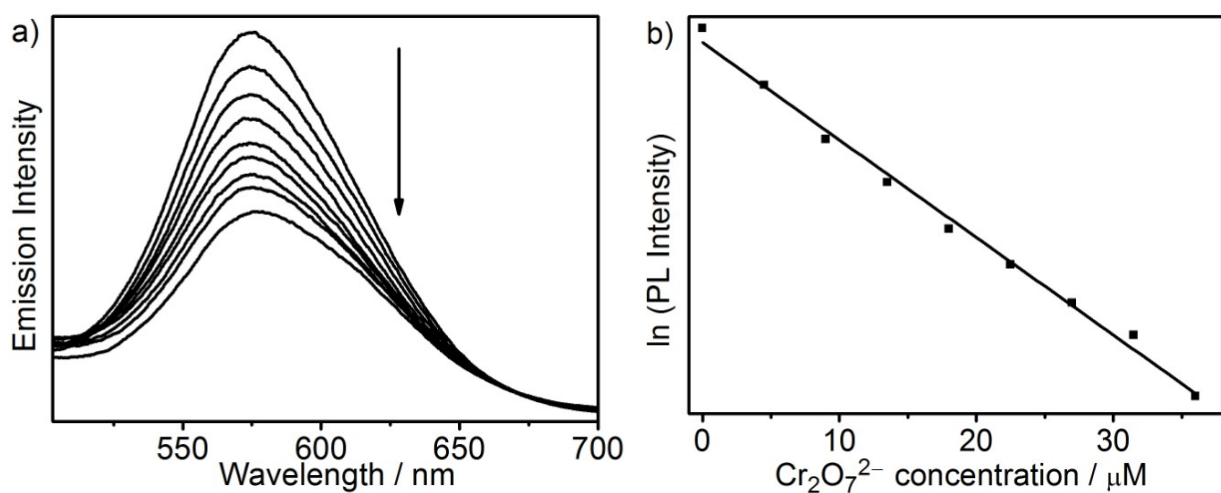

**Figure S8** a) Emission spectral changes of Cu NCs in Taihu lake water upon addition of different

amounts of  $\text{Cr}_2\text{O}_7^{2-}$  ions (0, 4.5, 9, 13.5, 18, 22.5, 27, 31.5, 36  $\mu\text{mol}\cdot\text{L}^{-1}$ ). b) Linear relationship between the logarithm of emission intensity and the concentration of  $\text{Cr}_2\text{O}_7^{2-}$  ions.

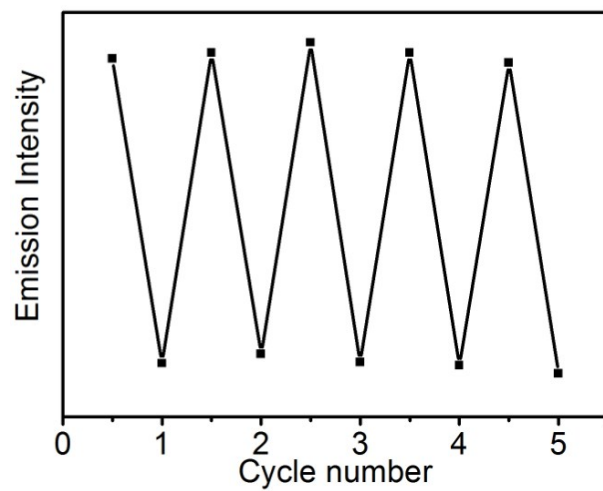

**Figure S9** Emission intensity changes upon alternating temperatures between 288 K and 313 K.
